# Supplementary material
Source: Springer Nature journal article supplement (https://www.springermedizin.de/resource/supplementary/12875_2006_168_MOESM1_ESM.pdf/9436436)
Supplement: MOESM1 [file 9436436]

14 This last section relates to your job satisfaction in dealing with the enhanced service to access as a practice manager. Please think of your job since the implementation of the New GMS contract and circle your thoughts.

a My practice's approach to the access enhanced service makes sense to me.

|                   |                |                      |
|-------------------|----------------|----------------------|
| Strongly Disagree | Disagree       | Neutral              |
| Agree             | Strongly Agree | N/A (Not applicable) |

b My perspective on how to manage access is valued and encouraged within the general practice.

|                   |                |                      |
|-------------------|----------------|----------------------|
| Strongly Disagree | Disagree       | Neutral              |
| Agree             | Strongly Agree | N/A (Not applicable) |

c The amount of work I am expected to do in relation to access management is reasonable.

|                   |                |                      |
|-------------------|----------------|----------------------|
| Strongly Disagree | Disagree       | Neutral              |
| Agree             | Strongly Agree | N/A (Not applicable) |

d I have adequate information available which enables me to do my job well in relation to this access-enhanced service

|                   |                |                      |
|-------------------|----------------|----------------------|
| Strongly Disagree | Disagree       | Neutral              |
| Agree             | Strongly Agree | N/A (Not applicable) |

e I understand the day-to-day goals in relation to patient access and the enhanced service

|                   |                |                      |
|-------------------|----------------|----------------------|
| Strongly Disagree | Disagree       | Neutral              |
| Agree             | Strongly Agree | N/A (Not applicable) |

f The practice management of access makes efficient use of resources in terms of time and cost to the practice

|                   |                |                      |
|-------------------|----------------|----------------------|
| Strongly Disagree | Disagree       | Neutral              |
| Agree             | Strongly Agree | N/A (Not applicable) |

g Considering everything, how satisfied are you with your job in relation to access and the enhanced service?

|                        |                     |                      |
|------------------------|---------------------|----------------------|
| Extremely dissatisfied | Dissatisfied        | Neutral              |
| Satisfied              | Extremely satisfied | N/A (Not applicable) |

This is the end of the questionnaire, thank you very much for completing and returning your answers.

Please make any comments in the space below.

.....

.....

.....

.....

.....

.....

.....

.....

.....

.....

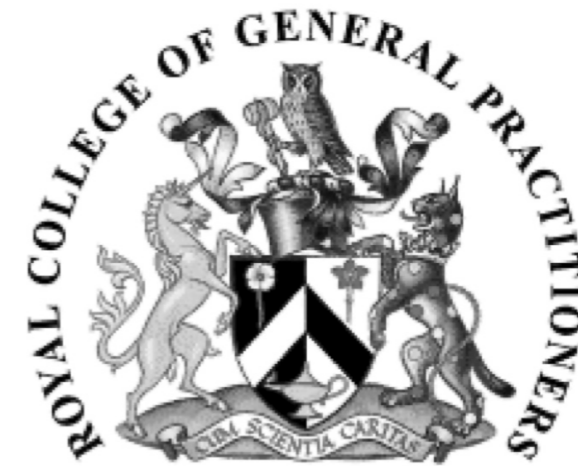

**Northern Ireland Council**

SURVEY ON ACCESS TO GENERAL PRACTICE  
STUDY SUPPORTED BY RCGPNI

Dr. J. Meade

## PRACTICE MANAGER QUESTIONNAIRE

This study looks at Access to general practice. The access service itself was summarised by the NHS plan "by 2004 all patients will be able to see a primary care professional care within 24 hours and a GP within 48 hours." The questionnaire should only take 10 minutes to complete.

Thank you for completing and returning in the prepaid envelope.

**PLEASE CIRCLE YOUR ANSWERS.**

**1** What is your time commitment as practice manger (please circle)?  
 Full time          Part time  
 If part time please specify \_\_\_\_\_ (e.g. ¾, ½, ¼, etc)

**2** What age group are you in (Please circle)?  
 20-29          30-39          40-49          50-59          60-69

**3** What sex are you (please circle)?  
 MALE          FEMALE

**4** Are the practice receptionists involved in allocating appointments with GPs and /or appointments with nurses in the practice (please circle)?  
  
 YES          NO  
 If NO, please go to Question 6

**5** Have your receptionist staff received specific training in relation to appointment management (please circle)?  
 YES          NO  
 If NO, proceed to question 6  
 If YES,  
 Was this training within the practice (please circle)?          YES          NO  
 Was this training provided outside the practice (please circle)?          YES          NO

**6** Please circle the main way in which practice appointments are recorded?  
 Paper record of appointments  
 Computerised appointment system

**7** What types of GP surgeries are used in your practice (Please circle any systems that your practice uses. There may be more than one system in use)  
 Telephone Consultations          YES          NO  
 Open surgeries (No pre-booking required)          YES          NO  
 Pre-booked appointments          YES          NO  
 Pre-booked appointments with some emergency slots          YES          NO  
 Pre-booked Appointments with some slots allocated and released within 2 working days for emergency or urgent appointments          YES          NO  
 "Extra" patients are seen after pre-booked surgeries are finished (Commonly referred to as "extras")          YES          NO  
 A telephone triage system is used. This is operated by a Clinician (GP or nurse) to assess whether patients will be seen as an "extra" or as an emergency          YES          NO

**8** Do requests for appointments ever result in interruptions to GP consultations (please circle)?  
 YES          NO

**9 (i)** If your practice accepts pre-booked appointments, can patients make an appointment more than 2 working days in advance?  
 YES          NO          NOT APPLICABLE

**(ii)** Is there a limit to how far in advance a patient can make an appointment?  
 YES          NO  
 If YES, what is the limit (eg 1 week, 1 month, etc) ..... (Please specify). If NO, go to Question 10.

**10** If patients are seen after pre-booked surgeries are finished ("extras"), Please circle any groups who see these "extra" patients  
 If no extras are seen, please go to question 12  
 GP Principal          Assistant GP          Locum GP          Registrar GP  
 Practice Nurse          Treatment Room Nurse          Nurse Practitioner

**11** Please circle the answer to the following statements regarding your practice  
 All extras are given a specific time to be seen          YES          NO  
 All extras told to come at one specific time and wait their turn          YES          NO

**12** If the practice uses a telephone triage system operated by a clinician (GP or nurse) to assess whether a patient needs to be seen as an "extra" or as an emergency. Please circle who does the triage.  
 If no system exists, please go Question 13.  
 GP Principal          Assistant GP          Locum GP          Registrar GP  
 Practice Nurse          Treatment Room Nurse          Nurse Practitioner

**13** Has your practice made any changes on how it manages requests for appointments as a result of the new enhanced service to access as described in the New GMS contract introduced in 1/4/04 (please circle)?  
 YES          NO  
 If No, proceed to Question 14  
 If YES, please circle the effect of this change, if any on the following:  
 Telephone Consultations  
 MORE          LESS          NO DIFFERENCE          NOT APPLICABLE  
 Open surgeries  
 MORE          LESS          NO DIFFERENCE          NOT APPLICABLE  
 Pre-booked appointments  
 MORE          LESS          NO DIFFERENCE          NOT APPLICABLE  
 Pre-booked appointments with more emergency slots  
 MORE          LESS          NO DIFFERENCE          NOT APPLICABLE  
 Pre-booked appointments with some slots allocated and released on the day for extras (commonly referred to as "extras")  
 MORE          LESS          NO DIFFERENCE          NOT APPLICABLE  
 Extra patients are seen after pre-booked surgeries are finished  
 MORE          LESS          NO DIFFERENCE          NOT APPLICABLE  
 A telephone triage system has been introduced since 1/4/04  
 YES          NO          ALREADY EXISTED  
 If telephone triage already existed in the practice before 1/4/04, the practice has employed this system since then in the following way  
 MORE          LESS          NO DIFFERENCE          NOT APPLICABLE  
 Telephone triage (whether new or already existing) has resulted in interruptions to GP surgery consultations since 1/4/04  
 MORE          LESS          NO DIFFERENCE          NOT APPLICABLE
